# Supplementary material
Source: Springer Nature journal article supplement (https://www.springermedizin.de/resource/supplementary/12865_2007_137_MOESM3_ESM.pdf/9428588)

Peripheral blood

MAL fluid

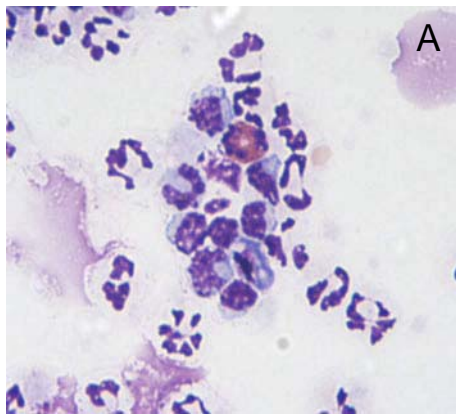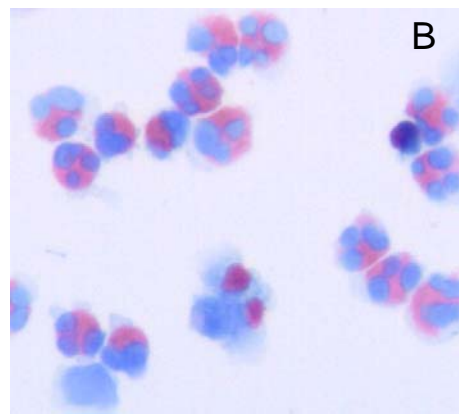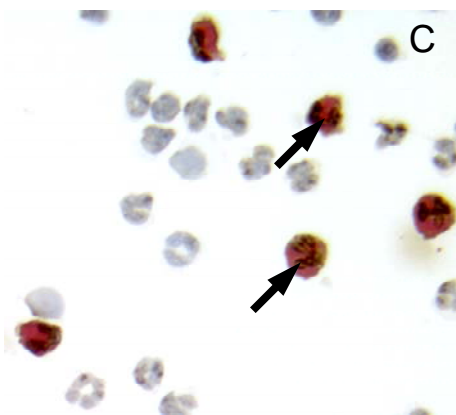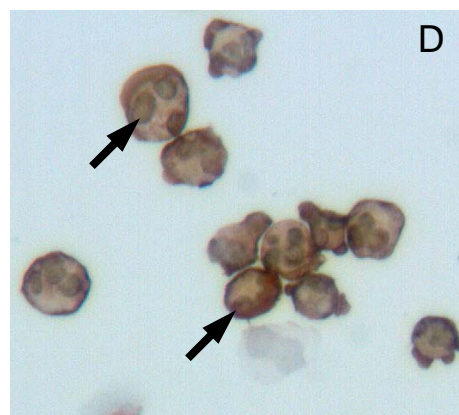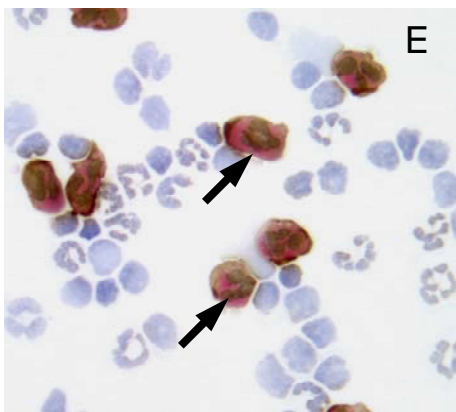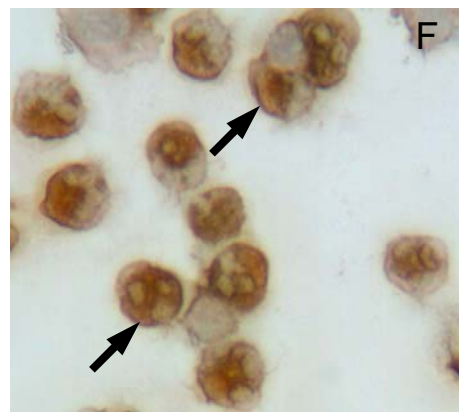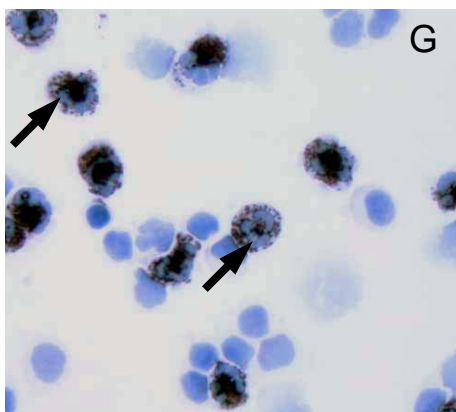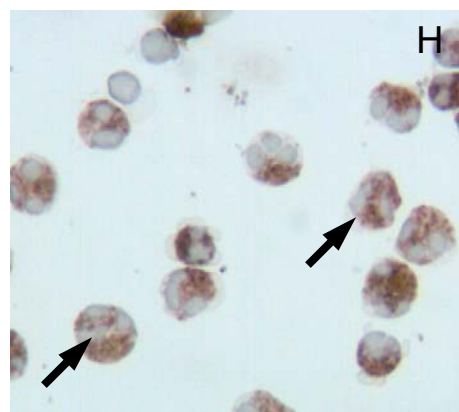

Supplement: MOESM3 [file 9428588]
